# Supplementary material for: Effectiveness, Safety and Patients’ Satisfaction of Nabiximols (Sativex®) on Multiple Sclerosis Spasticity and Related Symptoms in a Swiss Multicenter Study
Source: MDPI journal article supplement (doi:10.3390/jcm13102907), 2024-05-14
Supplement: s1 [file s1]

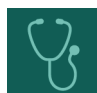

SUPPLEMENTARY TABLE S1. Logistic regression models

| Independent variables        | B      | OR    | 95% C.I. for OR | P                |
|------------------------------|--------|-------|-----------------|------------------|
| <b>Univariate analysis</b>   |        |       |                 |                  |
| Age (per year of age)        | -0.019 | 0.981 | 0.949-1.014     | 0.256            |
| Sex (female vs male)         | 0.642  | 1.900 | 0.769-04.697    | 0.165            |
| Disease duration             | -0.051 | 0.950 | 0.912-0.990     | <b>0.015</b>     |
| EDSS                         | -0.471 | 0.624 | 0.480-0.812     | <b>&lt;0.001</b> |
| Physiotherapy                | -1.497 | 0.224 | 0.025-1.994     | 0.180            |
| Disease modifying treatments | 0.575  | 1.778 | 0.737-4.291     | 0.201            |
| Other spasmolytic drugs      | -0.962 | 0.382 | 0.156-0.935     | <b>0.035</b>     |
| <b>Multivariate analysis</b> |        |       |                 |                  |
| Disease Duration             | -0.026 | 0.975 | 0.931-1.021     | 0.279            |
| Other spasmolytic drugs      | 0.686  | 1.986 | 0.754-5.233     | 0.165            |
| EDSS                         | -0.385 | 0.680 | 0.511-0.905     | <b>0.008</b>     |

Regression models investigating associations between clinical characteristics and improvement by at least 30% in pNRS after 12 weeks of treatment. B: Coefficient; C.I.: Confidence interval; OR: odds ratio; p: Significant  $\leq 0.05$ .
